# Supplementary material
Source: PubMed Central journal article supplement (PMC6320247)
Supplement: NIHMS991244-supplement-Supplemental_figures.pdf [file NIHMS991244-supplement-Supplemental_figures.pdf]

**Effects of HIV-1 TAT protein and methamphetamine exposure on visual  
discrimination and executive function in mice.**

James P. Kesby<sup>1,2\*</sup>, Jerel A. Fields<sup>1</sup>, Ariel Chang<sup>1</sup>, Hamza Coban<sup>1</sup>, Cristian L. Achim<sup>1</sup>,  
Svetlana Semenova<sup>1</sup>, and the TMARC Group.

<sup>1</sup>Department of Psychiatry, School of Medicine, University of California San Diego, La Jolla,  
CA, USA.

<sup>2</sup>Queensland Brain Institute, The University of Queensland, St. Lucia, Qld, Australia.

**Running Title:** TAT, METH and learning/executive function

\* Corresponding author:

Dr. James Kesby (ORCID: 0000-0002-5814-8062),

Queensland Brain Institute,

The University of Queensland,

Brisbane, QLD 4072, Australia.

Phone: +61 7 3346 6363

Fax: +61 7 3346 6301

Email: j.kesby@uq.edu.au

## SUPPLEMENTARY RESULTS

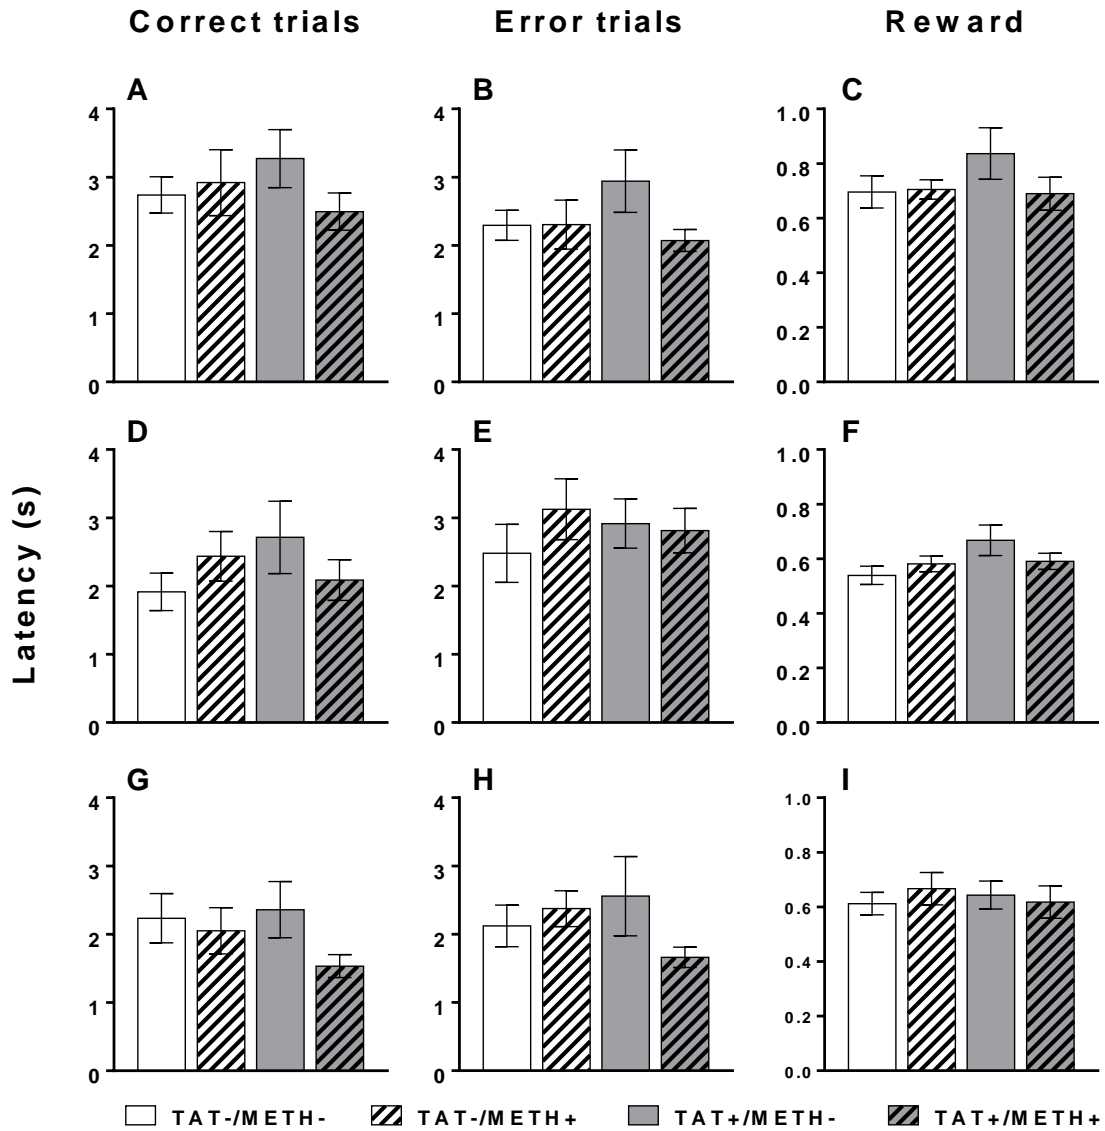

**Figure S1. Response latencies**

Effects of TAT expression (TAT+) and/or methamphetamine exposure (METH+) on the latency to respond for correct trials (**A, D, G**), error trials (**B, E, F**) and reward collection (**C, F, I**), during visual discrimination (**top row; A-C**), strategy switch (**middle row; D-F**) and reversal learning (**bottom row; G-I**). Data are expressed as mean  $\pm$  SEM.

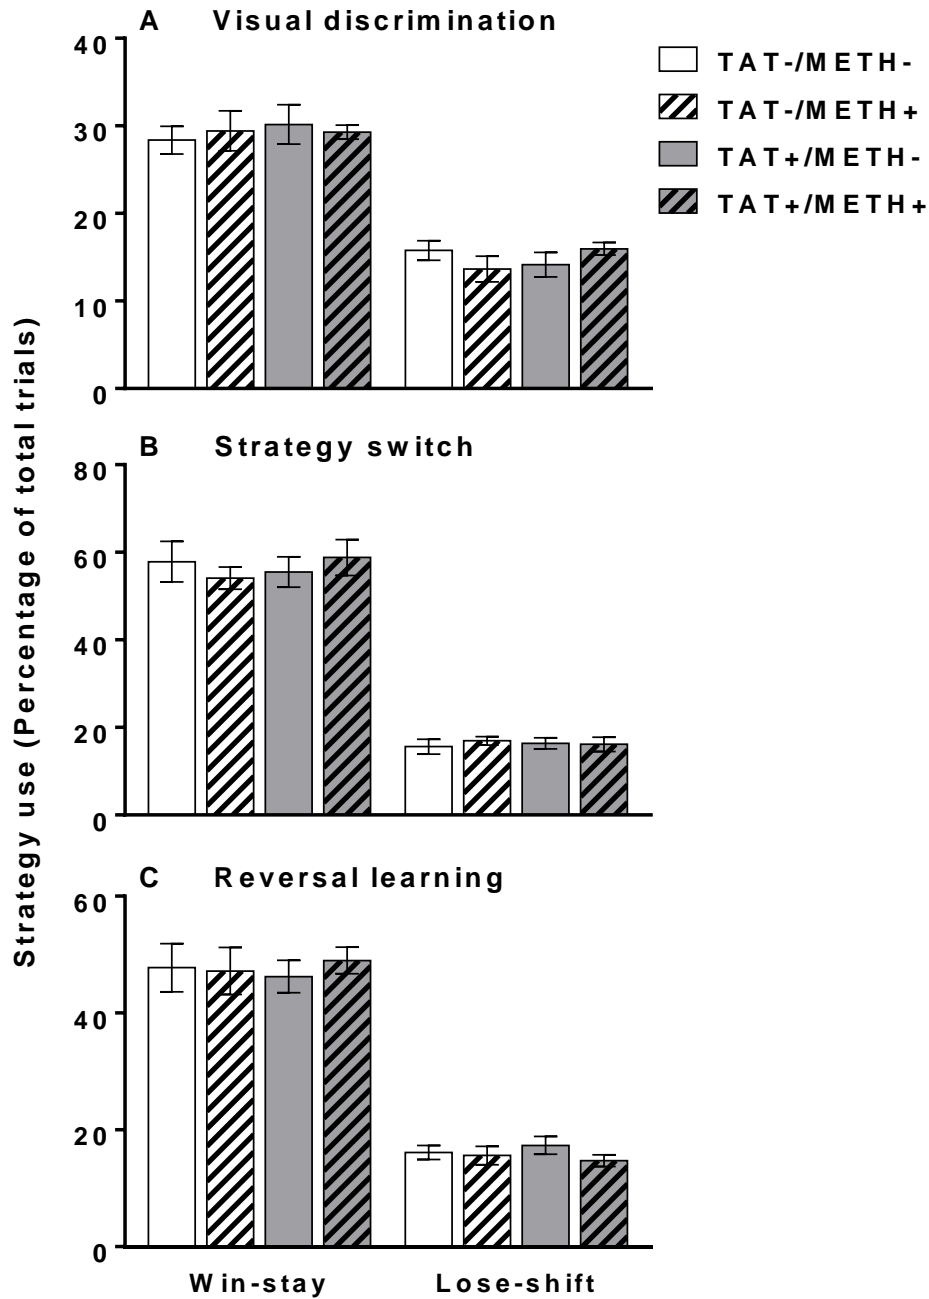

**Figure S2. Strategy use**

Effects of TAT expression (TAT+) and/or methamphetamine exposure (METH+) on win-stay/lose-shift strategy during visual discrimination (**A**), strategy switch (**B**) and reversal learning (**C**). Data are expressed as mean  $\pm$  SEM.

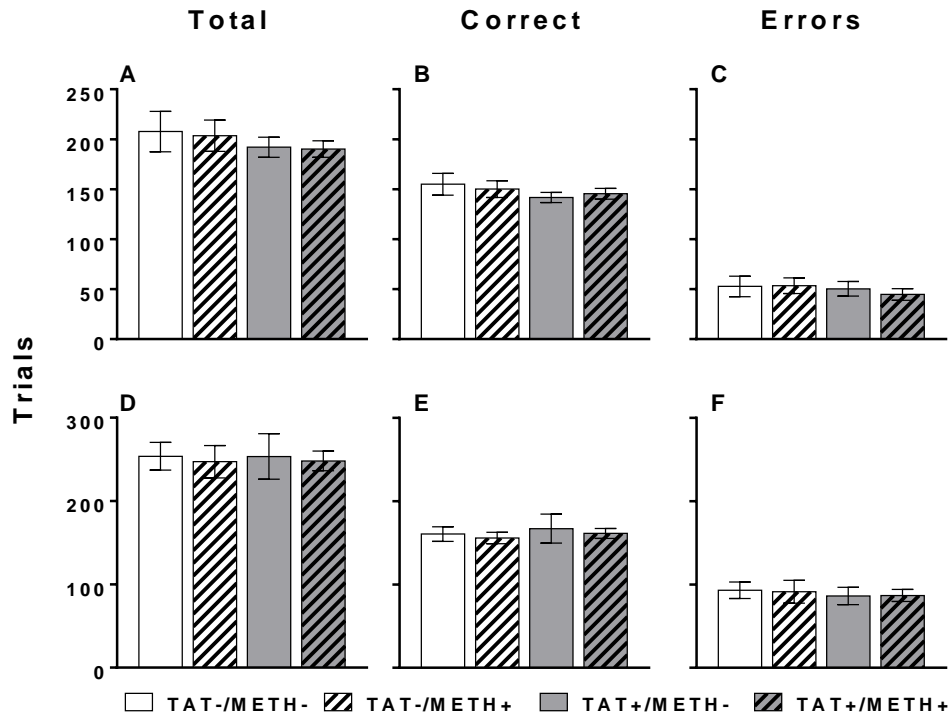

**Figure S3. Trials to criterion**

Effects of TAT expression (TAT+) and/or methamphetamine exposure (METH+) on the total (A, D), correct (B, E) and error (C, F) trials to criterion during the strategy switch (top row; A-c) and reversal learning (bottom row; D-F). Data are expressed as mean  $\pm$  SEM.

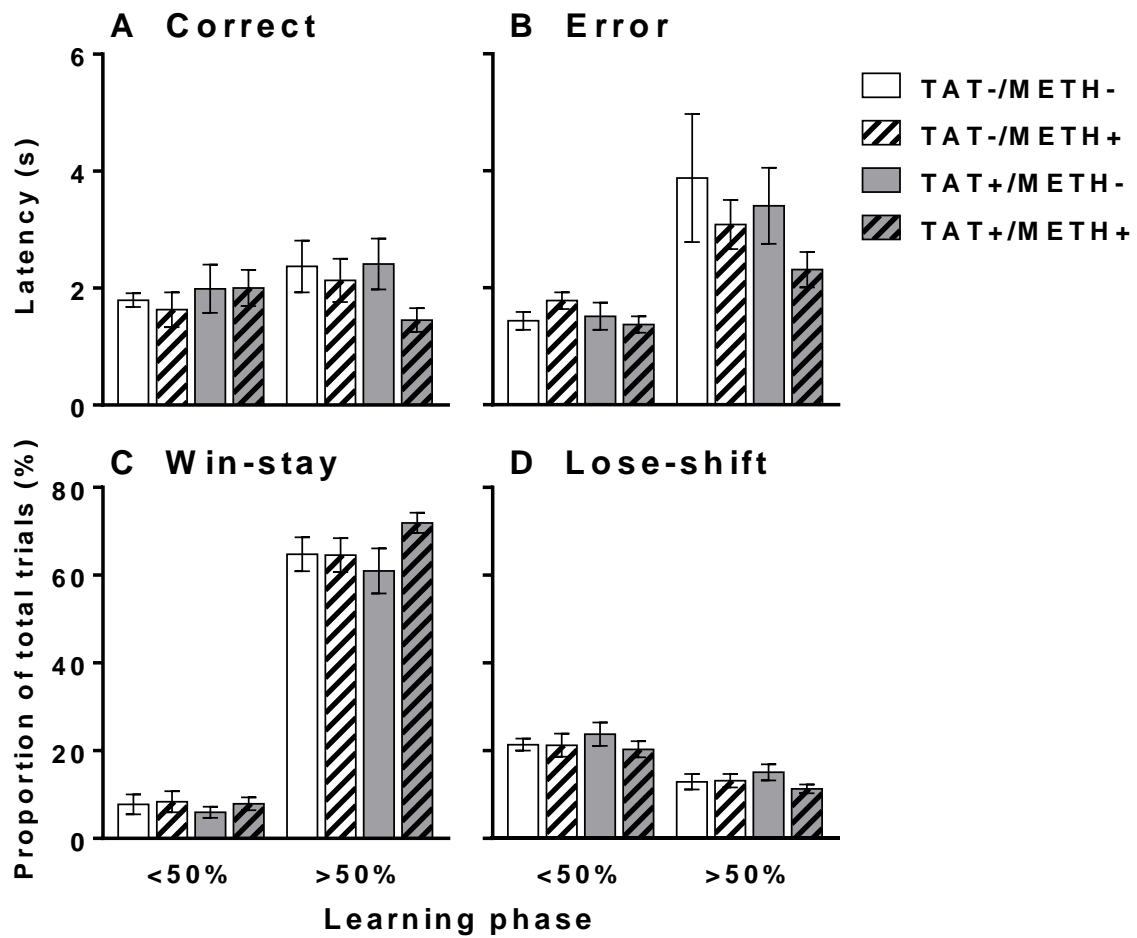

**Figure S4. Early and late phase reversal learning**

Effects of TAT expression (TAT+) and/or methamphetamine exposure (METH+) on the latency to respond for correct trials (A), latency to respond for error trials (B), win-stay strategy (C) and lose-shift strategy (D), during early (<50%) and late phase (>50%) reversal learning. Data are expressed as mean  $\pm$  SEM.
